# Supplementary material
Source: PubMed Central journal article supplement (PMC3027140)
Supplement: NIHMS263358-supplement-Supplemental_Table_1.pdf [file NIHMS263358-supplement-Supplemental_Table_1.pdf]

SNPs data downloaded from Mouse Phenome Database (<http://www.jax.org/phenome>)

| Mbp location (Build 37) | NCBI gene annotation           | Ensembl 48 gene annotation | dbSNP 128 SNP annotation | C3H/HeJ | C57BL/6J | dbSNP rs    | Observed | Source                | #map | Insertion alleles |
|-------------------------|--------------------------------|----------------------------|--------------------------|---------|----------|-------------|----------|-----------------------|------|-------------------|
| 17 34.402597            | <a href="#">H2-Ab1 intron2</a> | agrees                     | I                        | C       | T        | rs51700364  | C/T      | Perlegen2 NES17326117 | 1    |                   |
| 17 34.402787            | <a href="#">H2-Ab1 intron2</a> | agrees                     | I                        | A       | G        | rs52398399  | A/G      | Perlegen2 NES17326118 | 1    |                   |
| 17 34.403680            | <a href="#">H2-Ab1 intron2</a> | agrees                     | I                        | C       | T        | rs47594700  | C/T      | Perlegen2 NES17326050 | 1    |                   |
| 17 34.404081            | <a href="#">H2-Ab1 intron2</a> | agrees                     | I                        | T       | C        | rs504888882 | C/T      | Perlegen2 NES17325946 | 1    |                   |
| 17 34.404131            | <a href="#">H2-Ab1 intron2</a> | agrees                     | I                        | C       | A        | rs51985295  | A/C      | Perlegen2 NES17325947 | 1    |                   |
| 17 34.404242            | <a href="#">H2-Ab1 intron2</a> | agrees                     | I                        | G       | T        | rs48151264  | G/T      | Perlegen2 NES17325949 | 1    |                   |
| 17 34.404680            | <a href="#">H2-Ab1 intron3</a> | agrees                     | I                        | T       | A        | rs48003082  | A/T      | Perlegen2 NES17325959 | 1    |                   |
| 17 34.404878            | <a href="#">H2-Ab1 exon4</a>   | ... intron4                | Cs S219                  | C       | T        | rs46459473  | C/T      | Perlegen2 NES17325976 | 1    |                   |
| 17 34.404989            | <a href="#">H2-Ab1 intron4</a> | ... intron5                | I                        | A       | C        | rs45774904  | A/C      | Perlegen2 NES17325987 | 1    |                   |
| 17 34.405136            | <a href="#">H2-Ab1 intron4</a> | ... intron5                | I                        | G       | A        | rs49038047  | A/G      | Perlegen2 NES17325991 | 1    |                   |
| 17 34.405213            | <a href="#">H2-Ab1 intron4</a> | ... intron5                | I                        | C       | T        | rs47752513  | C/T      | Perlegen2 NES17325995 | 1    |                   |
| 17 34.405360            | <a href="#">H2-Ab1 intron4</a> | ... intron5                | I                        | C       | T        | rs50251478  | C/T      | Perlegen2 NES17325999 | 1    |                   |
| 17 34.405398            | <a href="#">H2-Ab1 intron4</a> | ... intron5                | I                        | T       | C        | rs49222965  | C/T      | Perlegen2 NES17326002 | 1    |                   |
| 17 34.405509            | <a href="#">H2-Ab1 intron5</a> | ... intron6                | I                        | C       | T        | rs48302250  | C/T      | Perlegen2 NES17326005 | 1    |                   |
| 17 34.405577            | <a href="#">H2-Ab1 intron5</a> | ... intron6                | I                        | A       | G        | rs46196046  | A/G      | Perlegen2 NES17326007 | 1    |                   |
| 17 34.405607            | <a href="#">H2-Ab1 intron5</a> | ... intron6                | I                        | T       | G        | rs46262937  | G/T      | Perlegen2 NES17326008 | 1    |                   |
| 17 34.405635            | <a href="#">H2-Ab1 intron5</a> | ... intron6                | I                        | T       | G        | rs50447988  | G/T      | Perlegen2 NES17326009 | 1    |                   |
| 17 34.405655            | <a href="#">H2-Ab1 intron5</a> | ... intron6                | I                        | A       | G        | rs49284250  | A/G      | Perlegen2 NES17326012 | 1    |                   |
| 17 34.405841            | <a href="#">H2-Ab1 intron5</a> | ... intron6                | I                        | C       | T        | rs51369983  | C/T      | Perlegen2 NES17326018 | 1    |                   |
| 17 34.405882            | <a href="#">H2-Ab1 intron5</a> | ... intron6                | I                        | G       | A        | rs46363847  | A/G      | Perlegen2 NES17326019 | 1    |                   |
| 17 34.405925            | <a href="#">H2-Ab1 intron5</a> | ... intron6                | I                        | G       | A        | rs45860674  | A/G      | Perlegen2 NES17326020 | 1    |                   |
| 17 34.406165            | <a href="#">H2-Ab1 UTR</a>     | ... exon7,UTR              | U                        | C       | T        | rs47768856  | C/T      | Perlegen2 NES17326026 | 1    |                   |
| 17 34.406291            | <a href="#">H2-Ab1 UTR</a>     | ... exon7,UTR              | U                        | C       | A        | rs47897463  | A/C      | Perlegen2 NES17326034 | 1    |                   |
| 17 34.418587            |                                |                            | H2-Aa L                  | A       | T        | rs47349053  | A/T      | Perlegen2 NES17325773 | 1    |                   |
| 17 34.418601            |                                |                            | H2-Aa L                  | T       | C        | rs45639464  | C/T      | Perlegen2 NES17325774 | 1    |                   |
| 17 34.418649            |                                |                            | H2-Aa L                  | C       | T        | rs49888973  | C/T      | Perlegen2 NES17325775 | 1    |                   |
| 17 34.418848            |                                |                            | H2-Aa L                  | C       | G        | rs50305674  | C/G      | Perlegen2 NES17325777 | 1    |                   |
| 17 34.418887            |                                |                            | H2-Aa L                  | A       | T        | rs49569594  | A/T      | Perlegen2 NES17325778 | 1    |                   |
| 17 34.419622            |                                |                            | H2-Aa L                  | A       | G        | rs49126738  | A/G      | Perlegen2 NES17325694 | 1    |                   |
| 17 34.419765            | <a href="#">H2-Aa UTR</a>      | agrees                     | U                        | G       | A        | rs50124520  | A/G      | Perlegen2 NES17325695 | 1    |                   |
| 17 34.419778            | <a href="#">H2-Aa UTR</a>      | agrees                     | U                        | C       | A        | rs49828988  | A/C      | Perlegen2 NES17325696 | 1    |                   |
| 17 34.419853            | <a href="#">H2-Aa UTR</a>      | agrees                     | U                        | G       | A        | rs47258122  | A/G      | Perlegen2 NES17325698 | 1    |                   |
| 17 34.419885            | <a href="#">H2-Aa UTR</a>      | agrees                     | U                        | A       | G        | rs48107722  | A/G      | Perlegen2 NES17325699 | 1    |                   |
| 17 34.419891            | <a href="#">H2-Aa UTR</a>      | agrees                     | U                        | G       | A        | rs46355393  | A/G      | Perlegen2 NES17325700 | 1    |                   |
| 17 34.420331            | <a href="#">H2-Aa intron3</a>  | agrees                     | I                        | G       | T        | rs51534548  | G/T      | Perlegen2 NES17325718 | 1    |                   |
| 17 34.420832            | <a href="#">H2-Aa intron2</a>  | agrees                     | I                        | C       | G        | rs46821762  | C/G      | Perlegen2 NES17325745 | 1    |                   |
| 17 34.420856            | <a href="#">H2-Aa intron2</a>  | agrees                     | I                        | T       | C        | rs50127359  | C/T      | Perlegen2 NES17325746 | 1    |                   |
| 17 34.420971            | <a href="#">H2-Aa intron2</a>  | agrees                     | I                        | T       | C        | rs50193544  | C/T      | Perlegen2 NES17325749 | 1    |                   |
| 17 34.421103            | <a href="#">H2-Aa intron2</a>  | agrees                     | I                        | T       | C        | rs48501835  | C/T      | Perlegen2 NES17325751 | 1    |                   |
| 17 34.421500            | <a href="#">H2-Aa intron1</a>  | agrees                     | I                        | C       | T        | rs52262351  | C/T      | Perlegen2 NES17325764 | 1    |                   |

|              |                                |                                 |          |   |   |            |     |                            |   |  |
|--------------|--------------------------------|---------------------------------|----------|---|---|------------|-----|----------------------------|---|--|
| 17 34.421580 | <a href="#">H2-Aa intron1</a>  | agrees                          | I        | C | T | rs52317153 | C/T | Perlegen2 NES17325765      | 1 |  |
| 17 34.421687 | <a href="#">H2-Aa intron1</a>  | agrees                          | I        | C | T | rs50437586 | C/T | Perlegen2 NES17325767      | 1 |  |
| 17 34.421832 | <a href="#">H2-Aa intron1</a>  | agrees                          | I        | C | A | rs52458567 | A/C | Perlegen2 NES17325578      | 1 |  |
| 17 34.421937 | <a href="#">H2-Aa intron1</a>  | agrees                          | I        | T | C | rs51756224 | C/T | Perlegen2 NES17325580      | 1 |  |
| 17 34.422058 | <a href="#">H2-Aa intron1</a>  | agrees                          | I        | C | T | rs46634624 | C/T | Perlegen2 NES17325586      | 1 |  |
| 17 34.422075 | <a href="#">H2-Aa intron1</a>  | agrees                          | I        | T | A | rs48584811 | A/T | Perlegen2 NES17325592      | 1 |  |
| 17 34.422175 | <a href="#">H2-Aa intron1</a>  | agrees                          | I        | C | T | rs51089906 | C/T | Perlegen2 NES17325602      | 1 |  |
| 17 34.422192 | <a href="#">H2-Aa intron1</a>  | agrees                          | I        | T | G | rs46771231 | G/T | Perlegen2 NES17325605      | 1 |  |
| 17 34.422320 | <a href="#">H2-Aa intron1</a>  | agrees                          | I        | A | G | rs46167959 | A/G | Perlegen2 NES17325611      | 1 |  |
| 17 34.422418 | <a href="#">H2-Aa intron1</a>  | agrees                          | I        | T | C | rs46564423 | C/T | Perlegen2 NES17325623      | 1 |  |
| 17 34.422485 | <a href="#">H2-Aa intron1</a>  | agrees                          | I        | T | C | rs48592345 | C/T | Perlegen2 NES17325625      | 1 |  |
| 17 34.423498 | <a href="#">H2-Aa intron1</a>  | agrees                          | I        | C | G | rs46242337 | C/G | Perlegen2 NES17325539      | 1 |  |
| 17 34.423622 | <a href="#">H2-Aa intron1</a>  | agrees                          | I        | A | T | rs50846292 | A/T | Perlegen2 NES17325542      | 1 |  |
| 17 34.423862 | <a href="#">H2-Aa intron1</a>  | agrees                          | I        | G | C | rs48602659 | C/G | Perlegen2 NES17325549      | 1 |  |
| 17 34.423889 | <a href="#">H2-Aa intron1</a>  | agrees                          | I        | C | T | rs48920073 | C/T | Perlegen2 NES17325551      | 1 |  |
| 17 34.423930 | <a href="#">H2-Aa intron1</a>  | agrees                          | I        | C | G | rs48519247 | C/G | Perlegen2 NES17325552      | 1 |  |
| 17 34.424086 | <a href="#">H2-Aa intron1</a>  | agrees                          | I        | T | C | rs49774668 | C/T | Perlegen2 NES17325451      | 1 |  |
| 17 34.424124 | <a href="#">H2-Aa intron1</a>  | agrees                          | I        | G | A | rs48032237 | A/G | Perlegen2 NES17325452      | 1 |  |
| 17 34.424152 | <a href="#">H2-Aa intron1</a>  | agrees                          | I        | A | G | rs47400798 | A/G | Perlegen2 NES17325455      | 1 |  |
| 17 34.424175 | <a href="#">H2-Aa intron1</a>  | agrees                          | I        | A | G | rs50055829 | A/G | Perlegen2 NES17325457      | 1 |  |
| 17 34.424280 | <a href="#">H2-Aa intron1</a>  | agrees                          | I        | A | T | rs51513125 | A/T | Perlegen2 NES17325461      | 1 |  |
| 17 34.424522 | <a href="#">H2-Aa intron1</a>  | agrees                          | I        | G | T | rs48585494 | G/T | Perlegen2 NES17325466      | 1 |  |
| 17 34.424548 | <a href="#">H2-Aa intron1</a>  | agrees                          | I        | A | C | rs49026095 | A/C | Perlegen2 NES17325467      | 1 |  |
| 17 34.424721 |                                | <a href="#">H2-Aa exon1.UTR</a> | L        | C | T | rs50143974 | C/T | Perlegen2 NES17325471      | 1 |  |
| 17 34.424734 |                                | <a href="#">H2-Aa exon1.UTR</a> | L        | C | A | rs49234447 | A/C | Perlegen2 NES17325474      | 1 |  |
| 17 34.424779 |                                |                                 | H2-Aa L  | A | G | rs50791176 | A/G | Perlegen2 NES17325478      | 1 |  |
| 17 34.424843 |                                |                                 | H2-Aa L  | C | A | rs51300918 | A/C | Perlegen2 NES17325479      | 1 |  |
| 17 34.424928 |                                |                                 | H2-Aa L  | G | A | rs45662637 | A/G | Perlegen2 NES17325483      | 1 |  |
| 17 34.444948 | <a href="#">H2-Eb1 intron1</a> |                                 | I        | C | A | rs49027019 | A/C | Perlegen2 NES17324938      | 1 |  |
| 17 34.445060 | <a href="#">H2-Eb1 intron1</a> |                                 | I        | T | C | rs47545004 | C/T | Perlegen2 NES17324941      | 1 |  |
| 17 34.445141 | <a href="#">H2-Eb1 intron1</a> |                                 | I        | T | C | rs46122477 | C/T | Perlegen2 NES17324943      | 1 |  |
| 17 34.446426 | <a href="#">H2-Eb1 intron1</a> | ... exon1                       | I        | T | A | rs50851759 | A/T | Perlegen2 NES17324902      | 1 |  |
| 17 34.446980 | <a href="#">H2-Eb1 intron2</a> | agrees                          | I        | G | A | rs33056581 | A/G | merge_of_2_sources several | 1 |  |
| 17 34.461738 |                                |                                 | H2-Eb2 L | G | T | rs52161604 | G/T | Perlegen2 NES17324695      | 1 |  |
| 17 34.461867 |                                |                                 | H2-Eb2 L | G | T | rs33101719 | G/T | merge_of_2_sources several | 1 |  |
| 17 34.462010 |                                |                                 | H2-Eb2 L | T | C | rs33646816 | C/T | merge_of_2_sources several | 1 |  |
| 17 34.462032 |                                |                                 | H2-Eb2 L | A | G | rs33384802 | A/G | merge_of_2_sources several | 1 |  |
| 17 34.462170 |                                |                                 | H2-Eb2 L | G | A | rs51211926 | A/G | Perlegen2 NES17324703      | 1 |  |
| 17 34.462999 | <a href="#">H2-Eb2 intron1</a> | agrees                          | I        | A | C | rs50358877 | A/C | Perlegen2 NES17324718      | 1 |  |
| 17 34.463071 | <a href="#">H2-Eb2 intron1</a> | agrees                          | I        | G | T | rs46938663 | G/T | Perlegen2 NES17324719      | 1 |  |
| 17 34.463276 | <a href="#">H2-Eb2 intron1</a> | agrees                          | I        | C | T | rs48300472 | C/T | Perlegen2 NES17324722      | 1 |  |
| 17 34.465335 | <a href="#">H2-Eb2 intron1</a> | agrees                          | I        | A | G | rs47212380 | A/G | Perlegen2 NES17324656      | 1 |  |
| 17 34.465410 | <a href="#">H2-Eb2 intron1</a> | agrees                          | I        | C | A | rs47487693 | A/C | Perlegen2 NES17324657      | 1 |  |
| 17 34.465488 | <a href="#">H2-Eb2 intron1</a> | agrees                          | I        | T | A | rs49593505 | A/T | Perlegen2 NES17324663      | 1 |  |
| 17 34.469992 | <a href="#">H2-Eb2 intron1</a> | agrees                          | I        | G | A | rs33385930 | A/G | merge_of_2_sources several | 1 |  |
| 17 34.470109 | <a href="#">H2-Eb2 intron1</a> | agrees                          | I        | C | T | rs33424799 | C/T | merge_of_3_sources several | 1 |  |

|              |                                      |                               |                |   |   |            |     |                                   |   |  |
|--------------|--------------------------------------|-------------------------------|----------------|---|---|------------|-----|-----------------------------------|---|--|
| 17 34.470867 | <a href="#">H2-Eb2 intron2</a>       | agrees                        | I              | G | A | rs48238040 | A/G | Perlegen2 NES17324562             | 1 |  |
| 17 34.471609 | <a href="#">H2-Eb2 intron3</a>       | agrees                        | I              | C | A | rs45756487 | A/C | Perlegen2 NES17324578             | 1 |  |
| 17 34.472409 | <a href="#">H2-Eb2 intron3</a>       | agrees                        | I              | G | A | rs50928377 | A/G | Perlegen2 NES17324592             | 1 |  |
| 17 34.472673 | <a href="#">H2-Eb2 intron3</a>       | agrees                        | I              | G | C | rs47840191 | C/G | Perlegen2 NES17324593             | 1 |  |
| 17 34.472700 | <a href="#">H2-Eb2 intron3</a>       | agrees                        | I              | C | T | rs33151382 | C/T | merge_of_2_sources several        | 1 |  |
| 17 34.473051 | <a href="#">H2-Eb2 intron4</a>       | agrees                        | I              | G | A | rs50955893 | A/G | Perlegen2 NES17324597             | 1 |  |
| 17 34.476848 | <a href="#">H2-Eb2 UTR</a>           | ... exon5,UTR                 | U              | G | A | rs47340657 | A/G | Perlegen2 NES17324470             | 1 |  |
| 17 34.477735 |                                      |                               | H2-Ea L        | A | T | rs3663337  | A/T | merge_of_2_sources several        | 1 |  |
| 17 34.477818 |                                      |                               | H2-Ea L        | A | G | rs3663919  | A/G | WICGR2 WI_WGS_17_33448565         | 1 |  |
| 17 34.478041 |                                      |                               | H2-Ea L        | G | T | rs3665150  | G/T | merge_of_5_sources_(w/WT) several | 1 |  |
| 17 34.479598 | <a href="#">H2-Ea intron3</a>        | agrees                        | I              | C | T | rs8265720  | C/T | Perlegen2 NES17324411             | 1 |  |
| 17 34.480917 | <a href="#">H2-Ea intron1</a>        | agrees                        | I              | C | T | rs33674690 | C/T | merge_of_2_sources several        | 1 |  |
| 17 34.481667 |                                      |                               | H2-Ea L        | G | A | rs3692949  | A/G | WICGR2 WI_WGS_17_33452414         | 1 |  |
| 17 34.481677 |                                      |                               | H2-Ea L        | A | G | rs3692965  | A/G | WICGR2 WI_WGS_17_33452424         | 1 |  |
| 17 34.481692 |                                      |                               | H2-Ea L        | T | C | rs3692986  | C/T | WICGR2 WI_WGS_17_33452439         | 1 |  |
| 17 34.481761 |                                      |                               | H2-Ea L        | T | C | rs3693576  | C/T | merge_of_2_sources several        | 1 |  |
| 17 34.481789 |                                      |                               | H2-Ea L        | C | A | rs3693631  | A/C | merge_of_2_sources several        | 1 |  |
| 17 34.481818 |                                      |                               | H2-Ea L        | G | A | rs3693692  | A/G | merge_of_2_sources several        | 1 |  |
| 17 34.491255 |                                      |                               | Btnl2 L        | T | A | rs50754696 | A/T | Perlegen2 NES17324009             | 1 |  |
| 17 34.492663 | <a href="#">Btnl2 intron1</a>        | agrees                        | I              | A | G | rs33573309 | A/G | merge_of_3_sources several        | 1 |  |
| 17 34.500117 | <a href="#">Btnl2 intron5</a>        | agrees                        | I              | G | A | rs46047043 | A/G | Perlegen2 NES17323806             | 1 |  |
| 17 34.500655 | <a href="#">Btnl2 intron6</a>        | agrees                        | I              | C | T | rs51059444 | C/T | Perlegen2 NES17323811             | 1 |  |
| 17 34.503683 | <a href="#">Btnl2 intron8</a>        | agrees                        | I              | T | A | rs47083752 | A/T | Perlegen2 NES17323725             | 1 |  |
| 17 34.503701 | <a href="#">Btnl2 intron8</a>        | agrees                        | I              | G | A | rs48580987 | A/G | Perlegen2 NES17323726             | 1 |  |
| 17 34.504216 | <a href="#">Btnl2 intron8</a>        | agrees                        | I              | G | A | rs49836483 | A/G | Perlegen2 NES17323684             | 1 |  |
| 17 34.504618 | <a href="#">Btnl2 intron8</a>        | agrees                        | I              | C | T | rs48224057 | C/T | Perlegen2 NES17323689             | 1 |  |
| 17 34.505347 | <a href="#">Btnl2 intron8</a>        | agrees                        | I              | A | G | rs46201126 | A/G | Perlegen2 NES17323648             | 1 |  |
| 17 34.505382 | <a href="#">Btnl2 intron8</a>        | agrees                        | I              | T | C | rs51513609 | C/T | Perlegen2 NES17323650             | 1 |  |
| 17 34.505769 | <a href="#">Btnl2 UTR</a>            | ... exon9,UTR                 | U              | G | C | rs47277306 | C/G | Perlegen2 NES17323655             | 1 |  |
| 17 34.505805 | <a href="#">Btnl2 UTR</a>            | ... exon9,UTR                 | U              | T | C | rs48495497 | C/T | Perlegen2 NES17323657             | 1 |  |
| 17 34.505867 | <a href="#">Btnl2 UTR</a>            | ... exon9,UTR                 | U              | C | T | rs50616951 | C/T | Perlegen2 NES17323659             | 1 |  |
| 17 34.505928 | <a href="#">Btnl2 UTR</a>            | ... exon9,UTR                 | U              | G | A | rs46709529 | A/G | Perlegen2 NES17323660             | 1 |  |
| 17 34.505965 | <a href="#">Btnl2 UTR</a>            | ... exon9,UTR                 | U              | A | G | rs49969591 | A/G | Perlegen2 NES17323662             | 1 |  |
| 17 34.506024 | <a href="#">Btnl2 UTR</a>            | ... exon9,UTR                 | U              | A | G | rs47846018 | A/G | Perlegen2 NES17323665             | 1 |  |
| 17 34.506159 | <a href="#">Btnl2 UTR</a>            | ... exon9,UTR                 | U              | C | T | rs48154897 | C/T | Perlegen2 NES17323674             | 1 |  |
| 17 34.506173 | <a href="#">Btnl2 UTR</a>            | ... exon9,UTR                 | U              | C | T | rs47578965 | C/T | Perlegen2 NES17323678             | 1 |  |
| 17 34.506483 |                                      |                               | Btnl2 L        | C | T | rs45763711 | C/T | Perlegen2 NES17323581             | 1 |  |
| 17 34.513235 |                                      |                               | LOC100038862 L | A | G | rs33334004 | A/G | merge_of_3_sources several        | 1 |  |
| 17 34.513408 |                                      |                               | LOC100038862 L | G | A | rs33310899 | A/G | merge_of_3_sources several        | 1 |  |
| 17 34.513908 |                                      |                               | LOC100038862 L | G | C | rs33547432 | C/G | merge_of_3_sources several        | 1 |  |
| 17 34.514999 | <a href="#">LOC100038862 intron2</a> | <a href="#">Btnl1 intron2</a> | LOC100038862 I | C | T | rs47022617 | C/T | Perlegen2 NES17323290             | 1 |  |
| 17 34.515105 | <a href="#">LOC100038862 intron2</a> | <a href="#">Btnl1 intron2</a> | LOC100038862 I | G | A | rs48326856 | A/G | Perlegen2 NES17323293             | 1 |  |
| 17 34.515718 | <a href="#">LOC100038862 intron2</a> | <a href="#">Btnl1 intron2</a> | LOC100038862 I | C | G | rs33181892 | C/G | merge_of_2_sources several        | 1 |  |
| 17 34.515834 | <a href="#">LOC100038862 intron2</a> | <a href="#">Btnl1 intron2</a> | LOC100038862 I | T | C | rs33239051 | C/T | merge_of_2_sources several        | 1 |  |
| 17 34.515890 | <a href="#">LOC100038862 intron2</a> | <a href="#">Btnl1 intron2</a> | LOC100038862 I | G | A | rs33629710 | A/G | merge_of_3_sources several        | 1 |  |
| 17 34.515960 | <a href="#">LOC100038862 intron2</a> | <a href="#">Btnl1 intron2</a> | LOC100038862 I | C | T | rs29500105 | C/T | merge_of_3_sources several        | 1 |  |

|              |                                      |                                  |              |   |   |            |     |                            |   |  |
|--------------|--------------------------------------|----------------------------------|--------------|---|---|------------|-----|----------------------------|---|--|
| 17 34.519017 | <a href="#">LOC100038862 intron5</a> | <a href="#">Btn1 intron5</a>     | LOC100038862 | G | A | rs33490075 | A/G | merge_of_2_sources several | 1 |  |
| 17 34.519481 | <a href="#">LOC100038862 intron8</a> | <a href="#">Btn1 intron8</a>     | LOC100038862 | C | T | rs33646249 | C/T | merge_of_2_sources several | 1 |  |
| 17 34.538087 |                                      | <a href="#">BC051142 intron1</a> |              | G | T | rs51538737 | G/T | Perlegen2 NES17322416      | 1 |  |
| 17 34.538115 |                                      | <a href="#">BC051142 intron1</a> |              | C | T | rs51504184 | C/T | Perlegen2 NES17322419      | 1 |  |
| 17 34.544266 |                                      | <a href="#">BC051142 intron1</a> |              | C | T | rs47549110 | C/T | Perlegen2 NES17322372      | 1 |  |
| 17 34.544866 |                                      | <a href="#">BC051142 intron1</a> |              | G | T | rs33457167 | G/T | merge_of_3_sources several | 1 |  |
| 17 34.545041 |                                      | <a href="#">BC051142 intron1</a> |              | A | G | rs33101812 | A/G | merge_of_3_sources several | 1 |  |
| 17 34.545300 |                                      | <a href="#">BC051142 intron1</a> |              | A | T | rs33358036 | A/T | merge_of_2_sources several | 1 |  |
| 17 34.545334 |                                      | <a href="#">BC051142 intron1</a> |              | C | T | rs33631371 | C/T | merge_of_2_sources several | 1 |  |
| 17 34.546804 |                                      | <a href="#">BC051142 intron1</a> |              | C | T | rs33444918 | C/T | merge_of_2_sources several | 1 |  |
| 17 34.546881 |                                      | <a href="#">BC051142 intron1</a> |              | C | G | rs3023444  | C/G | merge_of_4_sources several | 1 |  |
| 17 34.548140 |                                      | <a href="#">BC051142 intron1</a> |              | G | A | rs50643201 | A/G | Perlegen2 NES17322306      | 1 |  |
| 17 34.548319 |                                      | <a href="#">BC051142 intron1</a> |              | C | T | rs50181613 | C/T | Perlegen2 NES17322307      | 1 |  |
| 17 34.548356 |                                      | <a href="#">BC051142 intron1</a> |              | T | C | rs51493022 | C/T | Perlegen2 NES17322308      | 1 |  |
| 17 34.549072 |                                      | <a href="#">BC051142 intron1</a> |              | C | T | rs50473588 | C/T | Perlegen2 NES17322290      | 1 |  |
| 17 34.549601 |                                      | <a href="#">BC051142 intron1</a> |              | G | A | rs33243933 | A/G | merge_of_3_sources several | 1 |  |
| 17 34.549932 |                                      | <a href="#">BC051142 intron1</a> |              | A | G | rs33700084 | A/G | merge_of_3_sources several | 1 |  |
| 17 34.550047 |                                      | <a href="#">BC051142 intron1</a> |              | T | G | rs33315922 | G/T | merge_of_2_sources several | 1 |  |
| 17 34.550471 |                                      | <a href="#">BC051142 intron1</a> |              | T | A | rs33699857 | A/T | merge_of_3_sources several | 1 |  |
| 17 34.552357 |                                      | <a href="#">BC051142 intron1</a> | L            | T | C | rs50052608 | C/T | Perlegen2 NES17322201      | 1 |  |
| 17 34.552825 |                                      | <a href="#">BC051142 intron1</a> | L            | C | T | rs47831960 | C/T | Perlegen2 NES17322182      | 1 |  |
| 17 34.553437 | <a href="#">BC051142 UTR</a>         | agrees                           | U            | C | A | rs33137036 | A/C | merge_of_2_sources several | 1 |  |
| 17 34.554129 | <a href="#">BC051142 intron1</a>     | ... intron2                      | I            | G | T | rs33433578 | G/T | merge_of_2_sources several | 1 |  |
| 17 34.554876 | <a href="#">BC051142 intron2</a>     | ... intron3                      | I            | T | C | rs50459220 | C/T | Perlegen2 NES17322176      | 1 |  |
| 17 34.557221 | <a href="#">BC051142 intron4</a>     | ... intron5                      | I            | C | A | rs33357722 | A/C | merge_of_3_sources several | 1 |  |
| 17 34.558218 | <a href="#">BC051142 intron4</a>     | ... intron5                      | I            | C | T | rs33495903 | C/T | merge_of_3_sources several | 1 |  |
| 17 34.559046 | <a href="#">BC051142 intron5</a>     | ... intron7                      | I            | A | G | rs47704390 | A/G | Perlegen2 NES17322052      | 1 |  |
| 17 34.559123 | <a href="#">BC051142 intron5</a>     | ... intron7                      | I            | C | T | rs29519048 | C/T | merge_of_3_sources several | 1 |  |
| 17 34.563878 | <a href="#">BC051142 intron5</a>     | ... intron7                      | I            | A | G | rs47069831 | A/G | Perlegen2 NES17321936      | 1 |  |
| 17 34.563942 | <a href="#">BC051142 intron5</a>     | ... intron7                      | I            | T | C | rs49615952 | C/T | Perlegen2 NES17321938      | 1 |  |
| 17 34.564278 | <a href="#">BC051142 intron5</a>     | ... intron7                      | I            | G | T | rs46200209 | G/T | Perlegen2 NES17321930      | 1 |  |
| 17 34.565191 | <a href="#">BC051142 intron5</a>     | ... intron7                      | I            | G | A | rs33349566 | A/G | merge_of_2_sources several | 1 |  |
| 17 34.565554 | <a href="#">BC051142 intron5</a>     | ... intron7                      | I            | G | A | rs33212061 | A/G | merge_of_2_sources several | 1 |  |
| 17 34.565644 | <a href="#">BC051142 intron5</a>     | ... intron7                      | I            | C | T | rs6226116  | C/T | merge_of_3_sources several | 1 |  |
| 17 34.567373 | <a href="#">BC051142 intron5</a>     | ... intron7                      | I            | T | C | rs33496891 | C/T | merge_of_2_sources several | 1 |  |
| 17 34.568260 | <a href="#">BC051142 intron5</a>     | ... intron7                      | I            | C | T | rs33090949 | C/T | merge_of_2_sources several | 1 |  |
| 17 34.568331 | <a href="#">BC051142 intron5</a>     | ... intron7                      | I            | G | C | rs33621435 | C/G | merge_of_2_sources several | 1 |  |
| 17 34.568366 | <a href="#">BC051142 intron5</a>     | ... intron7                      | I            | C | T | rs33591410 | C/T | merge_of_2_sources several | 1 |  |
| 17 34.580120 | <a href="#">BC051142 intron6</a>     | ... intron15                     | I            | T | A | rs33666180 | A/T | merge_of_2_sources several | 1 |  |
| 17 34.580133 | <a href="#">BC051142 intron6</a>     | ... intron15                     | I            | C | T | rs33679327 | C/T | merge_of_2_sources several | 1 |  |
| 17 34.580502 | <a href="#">BC051142 intron7</a>     | ... intron16                     | I            | C | T | rs33499572 | C/T | merge_of_2_sources several | 1 |  |
| 17 34.581229 | <a href="#">BC051142 intron8</a>     | ... intron17                     | I            | C | T | rs33359996 | C/T | merge_of_3_sources several | 1 |  |
| 17 34.581764 | <a href="#">BC051142 intron8</a>     | ... intron17                     | I            | A | G | rs33315183 | A/G | merge_of_2_sources several | 1 |  |
| 17 34.582403 | <a href="#">BC051142 intron8</a>     | ... intron17                     | I            | C | T | rs33227163 | C/T | merge_of_2_sources several | 1 |  |
| 17 34.582650 | <a href="#">BC051142 intron9</a>     | ... intron18                     | I            | G | A | rs33604490 | A/G | merge_of_2_sources several | 1 |  |
| 17 34.583193 | <a href="#">BC051142 intron10</a>    | ... intron19                     | I            | G | A | rs33427340 | A/G | merge_of_2_sources several | 1 |  |

|              |                                   |                                  |          |   |   |            |     |                            |   |  |
|--------------|-----------------------------------|----------------------------------|----------|---|---|------------|-----|----------------------------|---|--|
| 17 34.583379 | <a href="#">BC051142 intron10</a> | ... intron19                     |          | C | T | rs47310619 | C/T | Perlegen2 NES17321535      | 1 |  |
| 17 34.585672 | <a href="#">BC051142 intron13</a> | ... intron22                     |          | T | C | rs52577448 | C/T | Perlegen2 NES17321370      | 1 |  |
| 17 34.590902 | <a href="#">BC051142 intron18</a> | ... intron27                     |          | G | C | rs33145661 | C/G | merge_of_2_sources several | 1 |  |
| 17 34.590917 | <a href="#">BC051142 intron18</a> | ... intron27                     |          | T | C | rs33191504 | C/T | merge_of_2_sources several | 1 |  |
| 17 34.592030 | <a href="#">BC051142 intron18</a> | ... intron27                     |          | A | G | rs33467174 | A/G | merge_of_2_sources several | 1 |  |
| 17 34.592090 | <a href="#">BC051142 intron18</a> | ... intron27                     |          | T | C | rs50381106 | C/T | Perlegen2 NES17321080      | 1 |  |
| 17 34.592631 | <a href="#">BC051142 intron18</a> | ... intron27                     |          | A | G | rs50131150 | A/G | Perlegen2 NES17321090      | 1 |  |
| 17 34.592674 | <a href="#">BC051142 intron18</a> | ... intron27                     |          | A | T | rs49726060 | A/T | Perlegen2 NES17321091      | 1 |  |
| 17 34.593363 | <a href="#">BC051142 intron18</a> | ... intron27                     |          | C | T | rs33687805 | C/T | merge_of_3_sources several | 1 |  |
| 17 34.594077 | <a href="#">BC051142 intron18</a> | ... intron27                     |          | T | C | rs33121150 | C/T | merge_of_2_sources several | 1 |  |
| 17 34.594395 | <a href="#">BC051142 intron18</a> | ... intron27                     |          | A | G | rs33426892 | A/G | merge_of_2_sources several | 1 |  |
| 17 34.594626 | <a href="#">BC051142 intron18</a> | ... intron27                     |          | C | T | rs33336094 | C/T | merge_of_2_sources several | 1 |  |
| 17 34.596576 | <a href="#">BC051142 intron18</a> | ... intron27                     |          | T | C | rs33527059 | C/T | merge_of_2_sources several | 1 |  |
| 17 34.597871 |                                   | BC051142 L                       |          | T | A | rs33662118 | A/T | merge_of_2_sources several | 1 |  |
| 17 34.604873 |                                   | EG632126 L                       |          | T | C | rs33681753 | C/T | merge_of_2_sources several | 1 |  |
| 17 34.605466 | <a href="#">EG632126 UTR</a>      | U                                |          | A | G | rs3089082  | A/G | WICGR1 M-08267-1           | 1 |  |
| 17 34.607291 | <a href="#">EG632126 intron8</a>  | <a href="#">Btnl2 intron7</a>    | EG632126 | A | C | rs52465935 | A/C | Perlegen2 NES17320728      | 1 |  |
| 17 34.607327 | <a href="#">EG632126 intron8</a>  | <a href="#">Btnl2 intron7</a>    | EG632126 | A | C | rs47830049 | A/C | Perlegen2 NES17320729      | 1 |  |
| 17 34.607790 | <a href="#">EG632126 intron8</a>  | <a href="#">Btnl2 intron7</a>    | EG632126 | G | A | rs33196303 | A/G | merge_of_2_sources several | 1 |  |
| 17 34.608045 | <a href="#">EG632126 intron7</a>  | <a href="#">Btnl2 intron6</a>    | EG632126 | G | C | rs47522916 | C/G | Perlegen2 NES17320720      | 1 |  |
| 17 34.608350 | <a href="#">EG632126 intron7</a>  | <a href="#">Btnl2 intron6</a>    | EG632126 | G | T | rs46164778 | G/T | Perlegen2 NES17320723      | 1 |  |
| 17 34.608485 | <a href="#">EG632126 intron7</a>  | <a href="#">Btnl2 intron6</a>    | EG632126 | C | A | rs50960969 | A/C | Perlegen2 NES17320724      | 1 |  |
| 17 34.609021 | <a href="#">EG632126 intron7</a>  | <a href="#">Btnl2 intron6</a>    | EG632126 | A | G | rs47327838 | A/G | Perlegen2 NES17320666      | 1 |  |
| 17 34.609121 | <a href="#">EG632126 intron7</a>  | <a href="#">Btnl2 intron6</a>    | EG632126 | T | G | rs52038286 | G/T | Perlegen2 NES17320667      | 1 |  |
| 17 34.609742 | <a href="#">EG632126 intron4</a>  | <a href="#">Btnl2 intron3</a>    | EG632126 | G | A | rs50277579 | A/G | Perlegen2 NES17320677      | 1 |  |
| 17 34.612225 | <a href="#">EG632126 intron2</a>  | <a href="#">Btnl2 intron1</a>    | EG632126 | A | G | rs49082615 | A/G | Perlegen2 NES17320604      | 1 |  |
| 17 34.612651 | <a href="#">EG632126 intron2</a>  | <a href="#">Btnl2 intron1</a>    | EG632126 | G | A | rs51849338 | A/G | Perlegen2 NES17320561      | 1 |  |
| 17 34.613088 | <a href="#">EG632126 intron1</a>  |                                  |          | T | A | rs47576940 | A/T | Perlegen2 NES17320570      | 1 |  |
| 17 34.613104 | <a href="#">EG632126 intron1</a>  |                                  |          | A | G | rs51121126 | A/G | Perlegen2 NES17320574      | 1 |  |
| 17 34.613222 | <a href="#">EG632126 intron1</a>  |                                  |          | T | C | rs48837264 | C/T | Perlegen2 NES17320575      | 1 |  |
| 17 34.613334 | <a href="#">EG632126 intron1</a>  |                                  |          | C | A | rs48063122 | A/C | Perlegen2 NES17320576      | 1 |  |
| 17 34.613916 | <a href="#">EG632126 intron1</a>  |                                  |          | C | T | rs48773840 | C/T | Perlegen2 NES17320578      | 1 |  |
| 17 34.614088 | <a href="#">EG632126 UTR</a>      |                                  |          | A | ? | rs51091174 | A/G | merge_of_2_sources several | 2 |  |
| 17 34.668136 |                                   |                                  | Btnl7 L  | A | T | rs47421754 | A/T | Perlegen2 NES17319984      | 1 |  |
| 17 34.669337 |                                   |                                  | Btnl7 L  | G | A | rs45660657 | A/G | Perlegen2 NES17319968      | 1 |  |
| 17 34.669610 |                                   |                                  | Btnl7 L  | A | C | rs33353308 | A/C | merge_of_2_sources several | 1 |  |
| 17 34.669698 |                                   |                                  | Btnl7 L  | C | T | rs46450453 | C/T | Perlegen2 NES17319959      | 1 |  |
| 17 34.671536 | <a href="#">Btnl7 intron7</a>     | <a href="#">EG630249 intron7</a> | Btnl7    | A | C | rs33201990 | A/C | merge_of_2_sources several | 1 |  |
| 17 34.672825 | <a href="#">Btnl7 intron7</a>     | <a href="#">EG630249 intron7</a> | Btnl7    | G | A | rs47647238 | A/G | Perlegen2 NES17319902      | 1 |  |
| 17 34.672861 | <a href="#">Btnl7 intron7</a>     | <a href="#">EG630249 intron7</a> | Btnl7    | G | A | rs50086706 | A/G | Perlegen2 NES17319903      | 1 |  |
| 17 34.672908 | <a href="#">Btnl7 intron7</a>     | <a href="#">EG630249 intron7</a> | Btnl7    | A | T | rs50497854 | A/T | Perlegen2 NES17319904      | 1 |  |
| 17 34.672925 | <a href="#">Btnl7 intron7</a>     | <a href="#">EG630249 intron7</a> | Btnl7    | A | G | rs48208560 | A/G | Perlegen2 NES17319905      | 1 |  |
| 17 34.673311 | <a href="#">Btnl7 intron7</a>     | <a href="#">EG630249 intron7</a> | Btnl7    | G | A | rs50892197 | A/G | Perlegen2 NES17319887      | 1 |  |
| 17 34.673336 | <a href="#">Btnl7 intron7</a>     | <a href="#">EG630249 intron7</a> |          | G | A | rs48638588 | A/G | Perlegen2 NES17319888      | 2 |  |
| 17 34.673407 | <a href="#">Btnl7 intron7</a>     | <a href="#">EG630249 intron7</a> | Btnl7    | T | A | rs48895629 | A/T | Perlegen2 NES17319889      | 1 |  |
| 17 34.674173 | <a href="#">Btnl7 intron6</a>     | <a href="#">EG630249 intron6</a> | Btnl7    | T | C | rs33186644 | C/T | merge_of_2_sources several | 1 |  |

|              |                                 |                                  |                   |   |   |            |       |                            |   |  |
|--------------|---------------------------------|----------------------------------|-------------------|---|---|------------|-------|----------------------------|---|--|
| 17 34.674674 | <a href="#">Btl7 intron6</a>    | <a href="#">EG630249 intron6</a> | Btl7 I            | C | A | rs49012953 | A/C   | Perlegen2 NES17319861      | 1 |  |
| 17 34.674695 | <a href="#">Btl7 intron6</a>    | <a href="#">EG630249 intron6</a> | Btl7 I            | G | A | rs46994204 | A/G   | Perlegen2 NES17319862      | 1 |  |
| 17 34.674738 | <a href="#">Btl7 intron6</a>    | <a href="#">EG630249 intron6</a> | Btl7 I            | C | T | rs49427397 | C/T   | Perlegen2 NES17319867      | 1 |  |
| 17 34.674842 | <a href="#">Btl7 intron6</a>    | <a href="#">EG630249 intron6</a> | Btl7 I            | G | A | rs46199156 | A/G   | Perlegen2 NES17319872      | 1 |  |
| 17 34.674863 | <a href="#">Btl7 intron6</a>    | <a href="#">EG630249 intron6</a> | Btl7 I            | A | G | rs49734909 | A/G   | Perlegen2 NES17319874      | 1 |  |
| 17 34.674877 | <a href="#">Btl7 intron6</a>    | <a href="#">EG630249 intron6</a> | Btl7 I            | G | A | rs50720858 | A/G   | Perlegen2 NES17319875      | 1 |  |
| 17 34.675504 | <a href="#">Btl7 intron6</a>    | <a href="#">EG630249 intron6</a> | Btl7 I            | T | C | rs49524338 | C/T   | Perlegen2 NES17319805      | 1 |  |
| 17 34.675779 | <a href="#">Btl7 intron6</a>    | <a href="#">EG630249 intron6</a> | Btl7 I            | T | G | rs52383668 | G/T   | Perlegen2 NES17319808      | 1 |  |
| 17 34.677433 | <a href="#">Btl7 intron6</a>    | <a href="#">EG630249 intron6</a> | Btl7 I            | A | G | rs50006138 | A/G   | Perlegen2 NES17319827      | 1 |  |
| 17 34.679331 | <a href="#">Btl7 intron2</a>    | <a href="#">EG630249 intron2</a> | Btl7 I            | T | C | rs50099982 | C/T   | Perlegen2 NES17319841      | 1 |  |
| 17 34.684805 |                                 |                                  | Btl7 L            | C | G | rs47209716 | C/G/T | Perlegen2 NES17319676      | 1 |  |
| 17 34.699824 |                                 |                                  | Notch4 L          | T | G | rs33351414 | G/T   | merge_of_2_sources several | 1 |  |
| 17 34.699875 |                                 |                                  | Notch4 L          | G | T | rs33380330 | G/T   | merge_of_2_sources several | 1 |  |
| 17 34.701513 | <a href="#">Notch4 intron1</a>  | agrees                           | I                 | A | G | rs51883642 | A/G   | Perlegen2 NES17319380      | 1 |  |
| 17 34.703958 | <a href="#">Notch4 intron3</a>  | agrees                           | I                 | C | T | rs33646118 | C/T   | merge_of_2_sources several | 1 |  |
| 17 34.704926 | <a href="#">Notch4 intron4</a>  | agrees                           | I                 | G | C | rs33107735 | C/G   | merge_of_2_sources several | 1 |  |
| 17 34.705543 | <a href="#">Notch4 exon6</a>    | agrees                           | Cs S372           | T | C | rs29503387 | C/T   | merge_of_2_sources several | 1 |  |
| 17 34.705582 | <a href="#">Notch4 intron6</a>  | agrees                           | I                 | C | T | rs33352806 | C/T   | merge_of_2_sources several | 1 |  |
| 17 34.707913 | <a href="#">Notch4 intron8</a>  | agrees                           | I                 | A | G | rs51954482 | A/G   | Perlegen2 NES17319256      | 1 |  |
| 17 34.714563 | <a href="#">Notch4 intron17</a> | agrees                           | I                 | G | T | rs29518121 | G/T   | merge_of_2_sources several | 1 |  |
| 17 34.719307 | <a href="#">Notch4 intron20</a> | agrees                           | I                 | T | C | rs33412322 | C/T   | merge_of_2_sources several | 1 |  |
| 17 34.752938 |                                 |                                  | Egfl8 L<br>Ppt2 L | T | C | rs33092092 | C/T   | merge_of_2_sources several | 1 |  |
| 17 34.754005 | <a href="#">Ppt2 UTR</a>        | ... exon8,UTR                    | U                 | A | G | rs33641609 | A/G   | merge_of_2_sources several | 1 |  |
| 17 34.759909 | <a href="#">Ppt2 intron5</a>    | agrees                           | I                 | T | C | rs33118075 | C/T   | merge_of_2_sources several | 1 |  |
| 17 34.760074 | <a href="#">Ppt2 intron4</a>    | agrees                           | I                 | G | A | rs33138542 | A/G   | merge_of_2_sources several | 1 |  |
| 17 34.784203 | <a href="#">Crebl1 exon1</a>    | agrees                           | Cs S7             | C | T | rs13468094 | C/T   | merge_of_2_sources several | 1 |  |
| 17 34.784753 | <a href="#">Crebl1 intron2</a>  | agrees                           | I                 | C | T | rs33651439 | C/T   | merge_of_2_sources several | 1 |  |
| 17 34.788136 | <a href="#">Crebl1 intron9</a>  | agrees                           | I                 | G | A | rs33094529 | A/G   | merge_of_2_sources several | 1 |  |
| 17 34.789475 | <a href="#">Crebl1 intron11</a> | agrees                           | I                 | A | G | rs49885098 | A/G   | Perlegen2 NES17317730      | 1 |  |
| 17 34.790959 | <a href="#">Crebl1 intron17</a> | agrees                           | I                 | T | C | rs47252686 | C/T   | Perlegen2 NES17317735      | 1 |  |
| 17 34.810523 | <a href="#">Tnxb intron3</a>    | <a href="#">Clcn1 intron3</a>    | Tnxb I            | A | G | rs52332005 | A/G   | Perlegen2 NES17323915      | 1 |  |
| 17 34.810875 | <a href="#">Tnxb intron3</a>    | <a href="#">Clcn1 intron3</a>    | Tnxb I            | C | G | rs48796857 | C/G   | Perlegen2 NES17323892      | 1 |  |
| 17 34.813526 | <a href="#">Tnxb intron3</a>    | <a href="#">Clcn1 intron3</a>    | Tnxb I            | G | T | rs8249962  | G/T   | Perlegen2 NES17323855      | 1 |  |
| 17 34.815276 | <a href="#">Tnxb intron3</a>    | <a href="#">Clcn1 intron3</a>    | Tnxb I            | G | A | rs33452137 | A/G   | merge_of_2_sources several | 1 |  |
| 17 34.815386 | <a href="#">Tnxb intron3</a>    | <a href="#">Clcn1 intron3</a>    | Tnxb I            | G | A | rs33314801 | A/G   | merge_of_2_sources several | 1 |  |
| 17 34.815488 | <a href="#">Tnxb intron3</a>    | <a href="#">Clcn1 intron3</a>    | Tnxb I            | T | G | rs46044214 | G/T   | Perlegen2 NES17323820      | 1 |  |
| 17 34.821148 | <a href="#">Tnxb intron7</a>    | <a href="#">Clcn1 intron7</a>    | Tnxb I            | G | C | rs48916566 | C/G   | Perlegen2 NES17323779      | 1 |  |
| 17 34.826753 | <a href="#">Tnxb intron11</a>   | <a href="#">Clcn1 intron11</a>   | Tnxb I            | T | A | rs46222545 | A/T   | Perlegen2 NES17323643      | 1 |  |
| 17 34.829818 | <a href="#">Tnxb intron13</a>   | <a href="#">Clcn1 intron13</a>   | Tnxb I            | C | T | rs33462206 | C/T   | merge_of_3_sources several | 1 |  |
| 17 34.830014 | <a href="#">Tnxb intron13</a>   | <a href="#">Clcn1 intron13</a>   | Tnxb I            | C | T | rs33503150 | C/T   | merge_of_2_sources several | 1 |  |
| 17 34.830318 | <a href="#">Tnxb intron13</a>   | <a href="#">Clcn1 intron13</a>   | Tnxb I            | T | C | rs8249979  | C/T   | Perlegen2 NES17323545      | 1 |  |
| 17 34.830686 | <a href="#">Tnxb intron13</a>   | <a href="#">Clcn1 intron13</a>   | Tnxb I            | T | C | rs51368240 | C/T   | Perlegen2 NES17323547      | 1 |  |
| 17 34.832025 | <a href="#">Tnxb intron15</a>   | <a href="#">Clcn1 intron15</a>   | Tnxb I            | G | A | rs33544039 | A/G   | merge_of_2_sources several | 1 |  |
| 17 34.832052 | <a href="#">Tnxb intron15</a>   | <a href="#">Clcn1 intron15</a>   | Tnxb I            | C | T | rs33637966 | C/T   | merge_of_2_sources several | 1 |  |
| 17 34.832716 | <a href="#">Tnxb intron16</a>   | <a href="#">Clcn1 intron16</a>   | Tnxb I            | A | T | rs51306284 | A/T   | Perlegen2 NES17323473      | 1 |  |

|              |                               |                                |               |   |   |            |     |                            |   |  |
|--------------|-------------------------------|--------------------------------|---------------|---|---|------------|-----|----------------------------|---|--|
| 17 34.833166 | <a href="#">Tnxb intron17</a> | <a href="#">Clcn1 intron17</a> | Tnxb I        | T | C | rs48062377 | C/T | Perlegen2 NES17323475      | 1 |  |
| 17 34.834488 | <a href="#">Tnxb intron17</a> | <a href="#">Clcn1 intron18</a> | Tnxb I        | G | A | rs45946156 | A/G | Perlegen2 NES17323401      | 1 |  |
| 17 34.836504 | <a href="#">Tnxb intron19</a> | <a href="#">Clcn1 intron20</a> | Tnxb I        | G | T | rs52206135 | G/T | Perlegen2 NES17323302      | 1 |  |
| 17 34.836648 | <a href="#">Tnxb intron19</a> | <a href="#">Clcn1 intron20</a> | Tnxb I        | A | G | rs50504205 | A/G | Perlegen2 NES17323304      | 1 |  |
| 17 34.836808 | <a href="#">Tnxb intron19</a> | <a href="#">Clcn1 intron20</a> | Tnxb I        | A | G | rs49084162 | A/G | Perlegen2 NES17323307      | 1 |  |
| 17 34.836841 | <a href="#">Tnxb intron19</a> | <a href="#">Clcn1 intron20</a> | Tnxb I        | C | T | rs49456316 | C/T | Perlegen2 NES17323308      | 1 |  |
| 17 34.837261 | <a href="#">Tnxb intron19</a> | <a href="#">Clcn1 intron20</a> | Tnxb I        | A | G | rs33450742 | A/G | merge_of_2_sources several | 1 |  |
| 17 34.837314 | <a href="#">Tnxb intron19</a> | <a href="#">Clcn1 intron20</a> | Tnxb I        | G | A | rs49804630 | A/G | Perlegen2 NES17323313      | 1 |  |
| 17 34.837445 | <a href="#">Tnxb intron19</a> | <a href="#">Clcn1 intron20</a> | Tnxb I        | G | A | rs48536662 | A/G | Perlegen2 NES17323315      | 1 |  |
| 17 34.838344 | <a href="#">Tnxb intron19</a> | <a href="#">Clcn1 intron20</a> | Tnxb I        | A | G | rs47295051 | A/G | Perlegen2 NES17323239      | 1 |  |
| 17 34.838461 | <a href="#">Tnxb intron19</a> | <a href="#">Clcn1 intron20</a> | Tnxb I        | T | C | rs48891458 | C/T | Perlegen2 NES17323241      | 1 |  |
| 17 34.838783 | <a href="#">Tnxb intron19</a> | <a href="#">Clcn1 intron20</a> |               | T | ? | rs45694969 | C/T | merge_of_2_sources several | 2 |  |
| 17 34.838834 | <a href="#">Tnxb intron19</a> | <a href="#">Clcn1 intron20</a> | Tnxb I        | A | G | rs50245592 | A/G | Perlegen2 NES17323243      | 1 |  |
| 17 34.838864 | <a href="#">Tnxb intron19</a> | <a href="#">Clcn1 intron20</a> |               | T | ? | rs49924510 | C/T | merge_of_2_sources several | 2 |  |
| 17 34.839233 | <a href="#">Tnxb intron19</a> | <a href="#">Clcn1 intron20</a> |               | G | A | rs29521284 | A/G | merge_of_3_sources several | 2 |  |
| 17 34.840178 | <a href="#">Tnxb intron19</a> | <a href="#">Clcn1 intron20</a> | Tnxb I        | G | C | rs48386867 | C/G | Perlegen2 NES17323143      | 1 |  |
| 17 34.840778 | <a href="#">Tnxb intron20</a> | <a href="#">Clcn1 intron21</a> | Tnxb I        | T | C | rs52453245 | C/T | Perlegen2 NES17323145      | 1 |  |
| 17 34.841575 | <a href="#">Tnxb intron21</a> | <a href="#">Clcn1 intron22</a> | Tnxb I        | C | T | rs48274081 | C/T | Perlegen2 NES17323147      | 1 |  |
| 17 34.842234 | <a href="#">Tnxb intron21</a> | <a href="#">Clcn1 intron22</a> | Tnxb I        | T | C | rs48786880 | C/T | Perlegen2 NES17323152      | 1 |  |
| 17 34.842433 | <a href="#">Tnxb intron21</a> | <a href="#">Clcn1 intron22</a> | Tnxb I        | G | A | rs47254065 | A/G | Perlegen2 NES17323153      | 1 |  |
| 17 34.842588 | <a href="#">Tnxb intron21</a> | <a href="#">Clcn1 intron22</a> | Tnxb I        | A | C | rs47013658 | A/C | Perlegen2 NES17323157      | 1 |  |
| 17 34.842682 | <a href="#">Tnxb intron21</a> | <a href="#">Clcn1 intron22</a> | Tnxb I        | C | T | rs45835719 | C/T | Perlegen2 NES17323159      | 1 |  |
| 17 34.842812 | <a href="#">Tnxb intron21</a> | <a href="#">Clcn1 intron22</a> | Tnxb I        | A | C | rs51183764 | A/C | Perlegen2 NES17323163      | 1 |  |
| 17 34.842852 | <a href="#">Tnxb intron21</a> | <a href="#">Clcn1 intron22</a> | Tnxb I        | C | A | rs51374802 | A/C | Perlegen2 NES17323164      | 1 |  |
| 17 34.843005 | <a href="#">Tnxb intron21</a> | <a href="#">Clcn1 intron22</a> | Tnxb I        | T | G | rs51911670 | G/T | Perlegen2 NES17323171      | 1 |  |
| 17 34.843034 | <a href="#">Tnxb intron21</a> | <a href="#">Clcn1 intron22</a> | Tnxb I        | T | C | rs51675045 | C/T | Perlegen2 NES17323174      | 1 |  |
| 17 34.844139 | <a href="#">Tnxb intron21</a> | <a href="#">Clcn1 intron22</a> |               | C | G | rs46244966 | C/G | Perlegen2 NES17323193      | 2 |  |
| 17 34.845081 | <a href="#">Tnxb intron21</a> | <a href="#">Clcn1 intron22</a> | Tnxb I        | C | T | rs50862682 | C/T | Perlegen2 NES17323201      | 1 |  |
| 17 34.845835 | <a href="#">Tnxb intron21</a> | <a href="#">Clcn1 intron22</a> |               | G | A | rs51069000 | A/G | Perlegen2 NES17322959      | 2 |  |
| 17 34.846278 | <a href="#">Tnxb intron21</a> | <a href="#">Clcn1 intron22</a> |               | G | A | rs51392955 | A/G | Perlegen2 NES17322963      | 2 |  |
| 17 34.846852 | <a href="#">Tnxb intron22</a> | <a href="#">Clcn1 intron23</a> | Tnxb I        | T | C | rs47764975 | C/T | Perlegen2 NES17322968      | 1 |  |
| 17 34.848060 | <a href="#">Tnxb intron24</a> | <a href="#">Clcn1 intron25</a> | Tnxb I        | T | C | rs51005354 | C/T | Perlegen2 NES17322977      | 1 |  |
| 17 34.848369 | <a href="#">Tnxb intron24</a> | <a href="#">Clcn1 intron25</a> | Tnxb I        | T | G | rs52444591 | G/T | Perlegen2 NES17322981      | 1 |  |
| 17 34.848720 | <a href="#">Tnxb intron25</a> | <a href="#">Clcn1 intron26</a> | Tnxb I        | T | C | rs45909676 | C/T | Perlegen2 NES17322983      | 1 |  |
| 17 34.848929 | <a href="#">Tnxb intron25</a> | <a href="#">Clcn1 intron26</a> | Tnxb I        | C | T | rs6329438  | C/T | merge_of_3_sources several | 1 |  |
| 17 34.848949 | <a href="#">Tnxb intron25</a> | <a href="#">Clcn1 intron26</a> | Tnxb I        | G | A | rs6329476  | A/G | merge_of_2_sources several | 1 |  |
| 17 34.850850 | <a href="#">Tnxb intron27</a> | <a href="#">Clcn1 intron28</a> | Tnxb I        | C | T | rs51414770 | C/T | Perlegen2 NES17322731      | 1 |  |
| 17 34.850869 | <a href="#">Tnxb intron27</a> | <a href="#">Clcn1 intron28</a> | Tnxb I        | A | C | rs49769805 | A/C | Perlegen2 NES17322733      | 1 |  |
| 17 34.851056 | <a href="#">Tnxb intron27</a> | <a href="#">Clcn1 intron28</a> | Tnxb I        | G | A | rs45784085 | A/G | Perlegen2 NES17322737      | 1 |  |
| 17 34.851358 | <a href="#">Tnxb intron27</a> | <a href="#">Clcn1 intron28</a> | Tnxb I        | C | A | rs46227217 | A/C | Perlegen2 NES17322739      | 1 |  |
| 17 34.851614 | <a href="#">Tnxb exon28</a>   | <a href="#">Clcn1 exon29</a>   | Tnxb Cs S3233 | G | T | rs49995471 | G/T | Perlegen2 NES17322740      | 1 |  |
| 17 34.852191 | <a href="#">Tnxb intron28</a> | <a href="#">Clcn1 intron29</a> | Tnxb I        | T | C | rs49981955 | C/T | Perlegen2 NES17322743      | 1 |  |
| 17 34.852348 | <a href="#">Tnxb intron28</a> | <a href="#">Clcn1 intron29</a> | Tnxb I        | G | T | rs50668225 | G/T | Perlegen2 NES17322744      | 1 |  |
| 17 34.852364 | <a href="#">Tnxb intron28</a> | <a href="#">Clcn1 intron29</a> |               | G | A | rs47170653 | A/G | Perlegen2 NES17322745      | 2 |  |
| 17 34.852378 | <a href="#">Tnxb intron28</a> | <a href="#">Clcn1 intron29</a> | Tnxb I        | T | C | rs48425292 | C/T | Perlegen2 NES17322746      | 1 |  |
| 17 34.852513 | <a href="#">Tnxb intron28</a> | <a href="#">Clcn1 intron29</a> | Tnxb I        | G | A | rs46258174 | A/G | Perlegen2 NES17322749      | 1 |  |

|              |                                 |                                |                  |   |   |            |     |                            |   |  |
|--------------|---------------------------------|--------------------------------|------------------|---|---|------------|-----|----------------------------|---|--|
| 17 34.853003 | <a href="#">Tnxb intron29</a>   | <a href="#">Clcn1 intron30</a> | Tnxb I           | G | T | rs51440028 | G/T | Perlegen2 NES17322756      | 1 |  |
| 17 34.853010 | <a href="#">Tnxb intron29</a>   | <a href="#">Clcn1 intron30</a> | Tnxb I           | T | G | rs47340466 | G/T | Perlegen2 NES17322757      | 1 |  |
| 17 34.853181 | <a href="#">Tnxb intron29</a>   | <a href="#">Clcn1 intron30</a> | Tnxb I           | C | A | rs48672512 | A/C | Perlegen2 NES17322758      | 1 |  |
| 17 34.853592 | <a href="#">Tnxb intron30</a>   | <a href="#">Clcn1 intron31</a> | Tnxb I           | A | G | rs48699251 | A/G | Perlegen2 NES17322763      | 1 |  |
| 17 34.854764 | <a href="#">Tnxb intron34</a>   | <a href="#">Clcn1 intron35</a> | Tnxb I           | T | C | rs52066174 | C/T | Perlegen2 NES17322769      | 1 |  |
| 17 34.854798 | <a href="#">Tnxb intron34</a>   | <a href="#">Clcn1 intron35</a> | Tnxb I           | C | T | rs52026579 | C/T | Perlegen2 NES17322774      | 1 |  |
| 17 34.854816 | <a href="#">Tnxb intron34</a>   | <a href="#">Clcn1 intron35</a> | Tnxb I           | C | T | rs45950396 | C/T | Perlegen2 NES17322777      | 1 |  |
| 17 34.855992 | <a href="#">Tnxb intron39</a>   | <a href="#">Clcn1 intron40</a> | Tnxb I           | T | G | rs48587671 | G/T | Perlegen2 NES17322815      | 1 |  |
| 17 34.856091 | <a href="#">Tnxb exon40</a>     | <a href="#">Clcn1 exon41</a>   | Tnxb Cs S3946    | C | T | rs47901086 | C/T | Perlegen2 NES17322819      | 1 |  |
| 17 34.856200 | <a href="#">Tnxb intron40</a>   | <a href="#">Clcn1 intron41</a> | Tnxb I           | A | G | rs45978918 | A/G | Perlegen2 NES17322824      | 1 |  |
| 17 34.856253 | <a href="#">Tnxb intron40</a>   | <a href="#">Clcn1 intron41</a> | Tnxb I           | A | G | rs50724233 | A/G | Perlegen2 NES17322827      | 1 |  |
| 17 34.856772 |                                 |                                | Tnxb L           | A | T | rs45796686 | A/T | Perlegen2 NES17322830      | 1 |  |
| 17 34.856823 |                                 |                                | Tnxb L           | T | C | rs8247222  | C/T | Perlegen2 NES17322831      | 1 |  |
| 17 34.856841 |                                 |                                | Tnxb L           | T | C | rs8247221  | C/T | Perlegen2 NES17322832      | 1 |  |
| 17 34.856901 |                                 |                                | Tnxb L           | A | G | rs48341608 | A/G | Perlegen2 NES17322833      | 1 |  |
| 17 34.857033 |                                 |                                | Tnxb L           | A | G | rs46854227 | A/G | Perlegen2 NES17322834      | 1 |  |
| 17 34.857050 |                                 |                                | Tnxb L           | C | T | rs48485817 | C/T | Perlegen2 NES17322835      | 1 |  |
| 17 34.863892 |                                 |                                | C4b L            | C | T | rs46840754 | C/T | Perlegen2 NES17322415      | 1 |  |
| 17 34.869491 | <a href="#">C4b intron30</a>    | <a href="#">C4a intron30</a>   | C4b I            | A | C | rs46956915 | A/C | Perlegen2 NES17322258      | 1 |  |
| 17 34.870182 | <a href="#">C4b intron28</a>    | <a href="#">C4a intron28</a>   | C4b I            | G | A | rs49431495 | A/G | Perlegen2 NES17322264      | 1 |  |
| 17 34.872250 | <a href="#">C4b intron21</a>    | <a href="#">C4a intron21</a>   | C4b I            | G | A | rs33571208 | A/G | merge_of_2_sources several | 1 |  |
| 17 34.879168 | <a href="#">C4b intron5</a>     | <a href="#">C4a intron5</a>    |                  | A | T | rs46558838 | A/T | merge_of_2_sources several | 2 |  |
| 17 34.879450 | <a href="#">C4b intron4</a>     | <a href="#">C4a intron4</a>    |                  | C | T | rs51701976 | C/T | merge_of_2_sources several | 2 |  |
| 17 34.880343 | <a href="#">C4b intron2</a>     | <a href="#">C4a intron2</a>    |                  | T | C | rs47904437 | C/T | merge_of_2_sources several | 2 |  |
| 17 34.880681 | <a href="#">C4b intron1</a>     | <a href="#">C4a intron1</a>    | C4b I            | G | A | rs49143873 | A/G | Perlegen2 NES17322053      | 1 |  |
| 17 34.880783 | <a href="#">C4b UTR</a>         | <a href="#">C4a exon1_UTR</a>  | C4b U            | C | T | rs46379994 | C/T | Perlegen2 NES17322054      | 1 |  |
| 17 34.881116 |                                 |                                | C4b L            | T | C | rs52507058 | C/T | Perlegen2 NES17321988      | 1 |  |
| 17 34.939566 | <a href="#">Cyp21a1 intron7</a> | agrees                         |                  | C | T | rs48451586 | C/T | Perlegen2 NES17322848      | 2 |  |
| 17 34.945427 |                                 |                                | C4a L            | C | T | rs45706172 | C/T | Perlegen2 NES17321649      | 1 |  |
| 17 34.945529 |                                 |                                | C4a L            | A | T | rs51663982 | A/T | Perlegen2 NES17321652      | 1 |  |
| 17 34.945828 |                                 |                                | C4a L            | C | T | rs46354664 | C/T | Perlegen2 NES17321654      | 1 |  |
| 17 34.948035 | <a href="#">C4a intron35</a>    | ... intron36                   | I                | C | T | rs33106219 | C/T | merge_of_2_sources several | 1 |  |
| 17 34.950157 | <a href="#">C4a intron30</a>    | ... intron31                   | I                | A | C | rs46799398 | A/C | Perlegen2 NES17321586      | 1 |  |
| 17 34.951848 | <a href="#">C4a intron24</a>    | ... intron25                   | I                | A | T | rs51225333 | A/T | Perlegen2 NES17321595      | 1 |  |
| 17 34.954745 | <a href="#">C4a intron15</a>    | agrees                         | I                | T | C | rs52215704 | C/T | Perlegen2 NES17321492      | 1 |  |
| 17 34.957249 | <a href="#">C4a intron9</a>     | agrees                         | I                | G | T | rs49514453 | G/T | Perlegen2 NES17321391      | 1 |  |
| 17 34.958217 | <a href="#">C4a intron7</a>     | agrees                         | I                | A | C | rs8247296  | A/C | Perlegen2 NES17321272      | 1 |  |
| 17 34.958746 | <a href="#">C4a intron5</a>     | agrees                         |                  | A | T | rs46558838 | A/T | merge_of_2_sources several | 2 |  |
| 17 34.959028 | <a href="#">C4a intron4</a>     | agrees                         |                  | C | T | rs51701976 | C/T | merge_of_2_sources several | 2 |  |
| 17 34.959212 | <a href="#">C4a intron3</a>     | agrees                         | C4a I<br>Stk19 L | T | C | rs8252782  | C/T | Perlegen2 NES17321278      | 1 |  |
| 17 34.959232 | <a href="#">C4a intron3</a>     | agrees                         | C4a I<br>Stk19 L | T | C | rs45933236 | C/T | Perlegen2 NES17321279      | 1 |  |
| 17 34.959561 | <a href="#">C4a intron2</a>     | agrees                         | C4a I<br>Stk19 L | G | A | rs46636569 | A/G | Perlegen2 NES17321287      | 1 |  |
|              |                                 |                                | C4a I            |   |   |            |     |                            |   |  |

|              |                                |               |                         |   |   |            |     |                            |   |  |
|--------------|--------------------------------|---------------|-------------------------|---|---|------------|-----|----------------------------|---|--|
| 17 34.959578 | <a href="#">C4a_intron2</a>    | agrees        | Stk19 L                 | C | A | rs51987006 | A/C | Perlegen2 NES17321288      | 1 |  |
| 17 34.959634 | <a href="#">C4a_intron2</a>    | agrees        | C4a I<br>Stk19 L        | C | T | rs46807396 | C/T | Perlegen2 NES17321289      | 1 |  |
| 17 34.959660 | <a href="#">C4a_intron2</a>    | agrees        | C4a I<br>Stk19 L        | A | T | rs49816046 | A/T | Perlegen2 NES17321290      | 1 |  |
| 17 34.959922 | <a href="#">C4a_intron2</a>    | agrees        |                         | T | C | rs47904437 | C/T | merge_of_2_sources several | 2 |  |
| 17 34.960376 | <a href="#">C4a_UTR</a>        | ... exon1,UTR | C4a U<br>Stk19 L        | G | C | rs46936848 | C/G | Perlegen2 NES17321222      | 1 |  |
| 17 34.960499 |                                |               | C4a L<br>Stk19 L        | A | T | rs51560786 | A/T | Perlegen2 NES17321223      | 1 |  |
| 17 34.960550 |                                |               | C4a L<br>Stk19 L        | T | A | rs49564750 | A/T | Perlegen2 NES17321226      | 1 |  |
| 17 34.960625 |                                |               | C4a L<br>Stk19 L        | T | C | rs50243787 | C/T | Perlegen2 NES17321228      | 1 |  |
| 17 34.961022 | <a href="#">Stk19_UTR</a>      | ... exon7,UTR | U                       | T | C | rs51482116 | C/T | Perlegen2 NES17321235      | 1 |  |
| 17 34.961097 | <a href="#">Stk19_UTR</a>      | ... exon7,UTR | U                       | G | A | rs49869978 | A/G | Perlegen2 NES17321237      | 1 |  |
| 17 34.961126 | <a href="#">Stk19_UTR</a>      | ... exon7,UTR | U                       | T | C | rs48425525 | C/T | Perlegen2 NES17321239      | 1 |  |
| 17 34.961373 | <a href="#">Stk19_intron6</a>  | agrees        | I                       | T | C | rs48693814 | C/T | Perlegen2 NES17321245      | 1 |  |
| 17 34.961408 | <a href="#">Stk19_intron6</a>  | agrees        | I                       | A | T | rs48607732 | A/T | Perlegen2 NES17321247      | 1 |  |
| 17 34.961991 | <a href="#">Stk19_intron4</a>  | agrees        | I                       | C | T | rs47384363 | C/T | Perlegen2 NES17321257      | 1 |  |
| 17 34.968683 | <a href="#">Stk19_intron4</a>  | agrees        |                         | A | G | rs33103744 | C/G | merge_of_2_sources several | 2 |  |
| 17 34.993877 | <a href="#">Cfb_intron16</a>   | agrees        | I                       | A | G | rs51170361 | A/G | Perlegen2 NES17320652      | 1 |  |
| 17 35.010847 | <a href="#">C2_intron6</a>     | agrees        | I                       | A | G | rs33668340 | A/G | merge_of_2_sources several | 1 |  |
| 17 35.091638 | <a href="#">LOC667548_UTR</a>  |               | Hspa1b L                | T | G | rs47492474 | G/T | Perlegen2 NES17319237      | 1 |  |
| 17 35.091674 | <a href="#">LOC667548_UTR</a>  |               | Hspa1b L                | T | C | rs50243276 | C/T | Perlegen2 NES17319239      | 1 |  |
| 17 35.176318 | <a href="#">Msh5_intron9</a>   | agrees        | I                       | G | T | rs33151903 | G/T | merge_of_2_sources several | 1 |  |
| 17 35.176666 | <a href="#">Msh5_intron9</a>   | agrees        | I                       | G | A | rs3724090  | A/G | merge_of_3_sources several | 1 |  |
| 17 35.197713 | <a href="#">Ddah2_intron3</a>  | agrees        | AU023871 L<br>Ddah2 I   | C | A | rs49339965 | A/C | Perlegen2 NES17327870      | 1 |  |
| 17 35.198644 | <a href="#">Ddah2_intron6</a>  | agrees        | Ddah2 I<br>AU023871 L   | T | C | rs51085735 | C/T | Perlegen2 NES17327876      | 1 |  |
| 17 35.199114 |                                |               | AU023871 L<br>Ddah2 L   | G | A | rs33637337 | A/G | merge_of_2_sources several | 1 |  |
| 17 35.199701 | <a href="#">AU023871_UTR</a>   |               | U                       | A | C | rs33332723 | A/C | merge_of_2_sources several | 1 |  |
| 17 35.199955 | <a href="#">AU023871_UTR</a>   |               | U                       | A | G | rs33278008 | A/G | merge_of_3_sources several | 1 |  |
| 17 35.200076 | <a href="#">AU023871_UTR</a>   |               | U                       | G | A | rs29498343 | A/G | merge_of_2_sources several | 1 |  |
| 17 35.200419 | <a href="#">AU023871_UTR</a>   |               | U                       | A | G | rs33565123 | A/G | merge_of_2_sources several | 1 |  |
| 17 35.200723 | <a href="#">AU023871_UTR</a>   |               | U                       | T | A | rs33282647 | A/T | merge_of_2_sources several | 1 |  |
| 17 35.201146 | <a href="#">AU023871_UTR</a>   |               | U                       | T | C | rs33324986 | C/T | merge_of_2_sources several | 1 |  |
| 17 35.201157 | <a href="#">AU023871_UTR</a>   |               | U                       | G | A | rs33160693 | A/G | merge_of_2_sources several | 1 |  |
| 17 35.202238 | <a href="#">G6b_UTR</a>        |               | AU023871 I              | T | A | rs33162743 | A/T | merge_of_2_sources several | 1 |  |
| 17 35.202740 | <a href="#">AU023871_exon2</a> |               | AU023871 Cs<br>Ly6g6c L | G | A | rs33197092 | A/G | merge_of_2_sources several | 1 |  |
| 17 35.203347 |                                |               | AU023871 L<br>Ly6g6c L  | A | G | rs47921571 | A/G | Perlegen2 NES17327725      | 1 |  |
| 17 35.204865 | <a href="#">Ly6g6c_intron1</a> | agrees        | I                       | C | T | rs33060265 | C/T | merge_of_2_sources several | 1 |  |

|              |                                |                |                      |   |   |            |     |                    |             |   |  |
|--------------|--------------------------------|----------------|----------------------|---|---|------------|-----|--------------------|-------------|---|--|
| 17 35.204877 | <a href="#">Ly6g6c intron1</a> | agrees         | I                    | T | C | rs33184541 | C/T | merge_of_2_sources | several     | 1 |  |
| 17 35.205070 | <a href="#">Ly6g6c intron1</a> | agrees         | I                    | T | C | rs33541170 | C/T | merge_of_2_sources | several     | 1 |  |
| 17 35.205191 | <a href="#">Ly6g6c intron1</a> | agrees         | I                    | C | T | rs33080603 | C/T | merge_of_2_sources | several     | 1 |  |
| 17 35.226055 |                                |                | Bat5 L               | C | T | rs50265539 | C/T | Perlegen2          | NES17327364 | 1 |  |
| 17 35.226137 |                                |                | Bat5 L               | C | T | rs50108726 | C/T | Perlegen2          | NES17327366 | 1 |  |
| 17 35.226876 | <a href="#">Bat5 intron1</a>   | agrees         | I                    | T | A | rs33368774 | A/T | merge_of_2_sources | several     | 1 |  |
| 17 35.227237 | <a href="#">Bat5 intron1</a>   | agrees         | I                    | G | A | rs33569927 | A/G | merge_of_2_sources | several     | 1 |  |
| 17 35.229582 | <a href="#">Bat5 intron4</a>   | agrees         | I                    | G | A | rs33499464 | A/G | merge_of_2_sources | several     | 1 |  |
| 17 35.229853 | <a href="#">Bat5 intron4</a>   | agrees         | I                    | A | G | rs33123886 | A/G | merge_of_2_sources | several     | 1 |  |
| 17 35.230006 | <a href="#">Bat5 intron4</a>   | agrees         | I                    | A | G | rs33568060 | A/G | merge_of_2_sources | several     | 1 |  |
| 17 35.231176 | <a href="#">Bat5 intron4</a>   | agrees         | I                    | C | T | rs52420801 | C/T | Perlegen2          | NES17327328 | 1 |  |
| 17 35.231991 | <a href="#">Bat5 intron5</a>   | agrees         | I                    | T | G | rs29499242 | G/T | merge_of_2_sources | several     | 1 |  |
| 17 35.233243 | <a href="#">Bat5 intron5</a>   | agrees         | I                    | T | C | rs51320612 | C/T | Perlegen2          | NES17327304 | 1 |  |
| 17 35.233619 | <a href="#">Bat5 intron7</a>   | agrees         | I                    | T | C | rs48410573 | C/T | Perlegen2          | NES17327307 | 1 |  |
| 17 35.233669 | <a href="#">Bat5 intron7</a>   | agrees         | I                    | A | T | rs46538129 | A/T | Perlegen2          | NES17327309 | 1 |  |
| 17 35.233853 | <a href="#">Bat5 intron7</a>   | agrees         | I                    | T | C | rs46351965 | C/T | Perlegen2          | NES17327310 | 1 |  |
| 17 35.233964 | <a href="#">Bat5 intron7</a>   | agrees         | I                    | A | G | rs48880235 | A/G | Perlegen2          | NES17327311 | 1 |  |
| 17 35.233990 | <a href="#">Bat5 intron7</a>   | agrees         | I                    | C | T | rs46234668 | C/T | Perlegen2          | NES17327312 | 1 |  |
| 17 35.234503 | <a href="#">Bat5 intron7</a>   | agrees         | I                    | T | G | rs33167550 | G/T | merge_of_2_sources | several     | 1 |  |
| 17 35.234610 | <a href="#">Bat5 intron7</a>   | agrees         | I                    | C | A | rs33280377 | A/C | merge_of_2_sources | several     | 1 |  |
| 17 35.234654 | <a href="#">Bat5 intron7</a>   | agrees         | I                    | A | G | rs49623213 | A/G | Perlegen2          | NES17327267 | 1 |  |
| 17 35.237120 | <a href="#">Bat5 intron9</a>   | agrees         | I                    | G | A | rs33298720 | A/G | merge_of_2_sources | several     | 1 |  |
| 17 35.237487 | <a href="#">Bat5 intron10</a>  | agrees         | I                    | T | C | rs3695474  | C/T | merge_of_2_sources | several     | 1 |  |
| 17 35.238298 | <a href="#">Bat5 intron13</a>  | agrees         | I                    | A | G | rs33231956 | A/G | merge_of_2_sources | several     | 1 |  |
| 17 35.238558 | <a href="#">Bat5 intron14</a>  | agrees         | I                    | A | T | rs33094525 | A/T | merge_of_2_sources | several     | 1 |  |
| 17 35.238836 | <a href="#">Bat5 intron15</a>  | agrees         | I                    | G | A | rs33594004 | A/G | merge_of_2_sources | several     | 1 |  |
| 17 35.239573 | <a href="#">Bat5 intron19</a>  | agrees         | I                    | C | G | rs49744963 | C/G | Perlegen2          | NES17327202 | 1 |  |
| 17 35.239699 | <a href="#">Bat5 UTR</a>       | ... exon20,UTR | U                    | G | A | rs47866287 | A/G | Perlegen2          | NES17327204 | 1 |  |
| 17 35.240279 |                                |                | Bat5 L               | C | T | rs33181887 | C/T | merge_of_2_sources | several     | 1 |  |
| 17 35.240379 |                                |                | Bat5 L               | A | G | rs49363581 | A/G | Perlegen2          | NES17327210 | 1 |  |
| 17 35.245386 | <a href="#">Ly6g5c intron1</a> | agrees         | I                    | C | G | rs49837967 | C/G | Perlegen2          | NES17327106 | 1 |  |
| 17 35.245816 | <a href="#">Ly6g5c intron1</a> | agrees         | I                    | G | A | rs29500114 | A/G | merge_of_2_sources | several     | 1 |  |
| 17 35.246008 | <a href="#">Ly6g5c intron1</a> | agrees         | I                    | G | A | rs29533361 | A/G | merge_of_3_sources | several     | 1 |  |
| 17 35.246336 | <a href="#">Ly6g5c intron1</a> | agrees         | I                    | A | G | rs47993081 | A/G | Perlegen2          | NES17327094 | 1 |  |
| 17 35.246389 | <a href="#">Ly6g5c intron1</a> | agrees         | I                    | G | A | rs51347288 | A/G | Perlegen2          | NES17327095 | 1 |  |
| 17 35.247489 | <a href="#">Ly6g5c intron1</a> | agrees         | I                    | G | A | rs50842666 | A/G | Perlegen2          | NES17327067 | 1 |  |
| 17 35.247865 | <a href="#">Ly6g5c intron2</a> | agrees         | I                    | T | C | rs47828222 | C/T | Perlegen2          | NES17327074 | 1 |  |
| 17 35.248083 | <a href="#">Ly6g5c intron2</a> | agrees         | I                    | A | G | rs46919246 | A/G | Perlegen2          | NES17327079 | 1 |  |
| 17 35.248616 | <a href="#">Ly6g5c intron2</a> | agrees         | I                    | T | C | rs51787795 | C/T | Perlegen2          | NES17327050 | 1 |  |
| 17 35.248730 | <a href="#">Ly6g5c intron2</a> | agrees         | I                    | T | C | rs51523121 | C/T | Perlegen2          | NES17327051 | 1 |  |
| 17 35.249694 |                                |                | Ly6g5b L             | T | C | rs48461149 | C/T | Perlegen2          | NES17327035 | 1 |  |
| 17 35.250498 |                                |                | Ly6g5b L             | C | T | rs46751650 | C/T | Perlegen2          | NES17327025 | 1 |  |
| 17 35.251224 | <a href="#">Ly6g5b UTR</a>     | ... exon3,UTR  | Ly6g5b U<br>Csnk2b L | C | T | rs8247970  | C/T | merge_of_2_sources | several     | 1 |  |
| 17 35.251825 | <a href="#">Ly6g5b intron2</a> | agrees         | Ly6g5b I<br>Csnk2b L | C | T | rs29503322 | C/T | merge_of_2_sources | several     | 1 |  |

|              |                                |               |                      |   |   |            |     |                            |   |  |
|--------------|--------------------------------|---------------|----------------------|---|---|------------|-----|----------------------------|---|--|
| 17 35.252206 | <a href="#">Ly6g5b intron1</a> | agrees        | Ly6g5b I<br>Csnk2b L | C | T | rs29500441 | C/T | merge_of_2_sources several | 1 |  |
| 17 35.252453 |                                |               | Csnk2b L<br>Ly6g5b L | G | T | rs8237822  | G/T | merge_of_2_sources several | 1 |  |
| 17 35.252924 |                                |               | Csnk2b L             | T | C | rs8237840  | C/T | Perlegen2 NES17327033      | 1 |  |
| 17 35.254050 | <a href="#">Csnk2b intron6</a> | agrees        | I                    | T | C | rs51994487 | C/T | Perlegen2 NES17327005      | 1 |  |
| 17 35.256609 | <a href="#">Csnk2b intron3</a> | agrees        | I                    | C | T | rs50117733 | C/T | Perlegen2 NES17326973      | 1 |  |
| 17 35.257121 | <a href="#">Csnk2b intron2</a> | agrees        | I                    | A | G | rs49858367 | A/G | Perlegen2 NES17326975      | 1 |  |
| 17 35.307486 |                                |               | Aif1 L               | T | G | rs8256688  | G/T | Perlegen2 NES17326547      | 1 |  |
| 17 35.310786 | <a href="#">Aif1 intron1</a>   |               | I                    | A | C | rs46692158 | A/C | Perlegen2 NES17326532      | 1 |  |
| 17 35.321171 |                                |               | Lst1 L               | C | A | rs29523477 | A/C | merge_of_2_sources several | 1 |  |
| 17 35.330152 |                                |               | Ltb L                | C | T | rs6259339  | C/T | merge_of_3_sources several | 1 |  |
| 17 35.338326 | <a href="#">Tnf intron1</a>    | agrees        | Lta L<br>Tnf I       | T | G | rs8257036  | G/T | Perlegen2 NES17326285      | 1 |  |
| 17 35.338557 | <a href="#">Tnf intron1</a>    | agrees        | Lta L<br>Tnf I       | A | G | rs8237589  | A/G | Perlegen2 NES17326291      | 1 |  |
| 17 35.338884 | <a href="#">Tnf UTR</a>        | ... exon1,UTR | Lta L<br>Tnf U       | C | T | rs8237593  | C/T | merge_of_2_sources several | 1 |  |
| 17 35.338972 |                                |               | Lta L<br>Tnf L       | A | G | rs8238041  | A/G | merge_of_2_sources several | 1 |  |
| 17 35.339023 |                                |               | Tnf L<br>Lta L       | C | A | rs8238040  | A/C | Perlegen2 NES17326302      | 1 |  |
| 17 35.339297 |                                |               | Tnf L<br>Lta L       | C | T | rs48161640 | C/T | Perlegen2 NES17326303      | 1 |  |
| 17 35.339928 |                                |               | Lta L                | T | C | rs49993158 | C/T | Perlegen2 NES17326305      | 1 |  |
| 17 35.341257 | <a href="#">Lta intron3</a>    | agrees        | I                    | G | A | rs8252728  | A/G | merge_of_2_sources several | 1 |  |
